# Supplementary material
Source: HighWire-hosted journal article supplement (https://rmdopen.bmj.com/content/7/2/e001595)
Supplement: inline-supplementary-material-1 [file inline-supplementary-material-1.pdf]

**ONLINE SUPPLEMENTARY MATERIAL**

|                                                                                                                                                                                                                                                                                                                                                      |    |
|------------------------------------------------------------------------------------------------------------------------------------------------------------------------------------------------------------------------------------------------------------------------------------------------------------------------------------------------------|----|
| Table S1. Summary of phase 1, phase 2, phase 3, phase 3/4b and LTE studies included in the safety analysis .....                                                                                                                                                                                                                                     | 2  |
| Treatment-emergent adverse events (AEs) and AEs of special interest .....                                                                                                                                                                                                                                                                            | 18 |
| Table S2. Number of adjudicated OI events by Preferred Term .....                                                                                                                                                                                                                                                                                    | 20 |
| Table S3. Number of adjudicated malignancy events (excluding NMSC) by Preferred Term* .....                                                                                                                                                                                                                                                          | 22 |
| Table S4. IRs (95% CI) for adjudicated gastrointestinal perforations according to concomitant NSAID and corticosteroid use.....                                                                                                                                                                                                                      | 27 |
| Figure S1. Kaplan-Meier plots of (A, B) time to mortality; (C, D) serious infection; (E, F) all HZ (non-serious and serious); (G, H) adjudicated malignancies excluding NMSC; (I, J) adjudicated NMSC; (K, L) adjudicated melanoma; and (M, N) lymphoma/lymphoproliferative disorder; for the average tofacitinib 5 mg BID and 10 mg BID doses. .... | 28 |
| Figure S2. Cumulative probability plots of (A, B) serious infections, and (C, D) HZ (serious and non-serious). ....                                                                                                                                                                                                                                  | 31 |
| References .....                                                                                                                                                                                                                                                                                                                                     | 32 |

**Table S1.** Summary of phase 1, phase 2, phase 3, phase 3/4b and LTE studies included in the safety analysis

| ClinicalTrials.gov identifier | Protocol number | Patients initially receiving tofacitinib, n | Patient population                                   | Tofacitinib doses                                | Control arm | Study duration                            |
|-------------------------------|-----------------|---------------------------------------------|------------------------------------------------------|--------------------------------------------------|-------------|-------------------------------------------|
| <b>RA clinical trials</b>     |                 |                                             |                                                      |                                                  |             |                                           |
| Phase 1                       |                 |                                             |                                                      |                                                  |             |                                           |
| NCT01262118[1]                | A3921130        | 36 (RA),<br>33 (healthy<br>volunteers)      | Active RA and healthy<br>volunteers                  | 10 mg BID (background<br>methotrexate permitted) | None        | 6 weeks                                   |
| NCT01484561[2]                | A3921152        | 97                                          | Active RA with<br>inadequate response to<br>≥1 DMARD | 10 mg BID (background<br>csDMARDs permitted)     | Placebo BID | 6 weeks<br>(for tofacitinib<br>treatment) |

| ClinicalTrials.gov identifier | Protocol number | Patients initially receiving tofacitinib, n | Patient population                                                                                                                           | Tofacitinib doses                                                    | Control arm                            | Study duration |
|-------------------------------|-----------------|---------------------------------------------|----------------------------------------------------------------------------------------------------------------------------------------------|----------------------------------------------------------------------|----------------------------------------|----------------|
| Phase 2                       |                 |                                             |                                                                                                                                              |                                                                      |                                        |                |
| NCT00147498[3]                | A3921019        | 199                                         | Active RA with inadequate response or unacceptable toxicity to methotrexate or to any of the following: etanercept, infliximab or adalimumab | 5 mg BID,<br>15 mg BID,<br>30 mg BID monotherapy                     | Placebo BID                            | 6 weeks        |
| NCT00413660[4]                | A3921025        | 438                                         | Active RA with inadequate response to methotrexate                                                                                           | 1, 3, 5, 10 or 15 mg BID or<br>20 mg QD with background methotrexate | Placebo                                | 24 weeks       |
| NCT00550446[5]                | A3921035        | 272                                         | Active RA with inadequate response or toxicity to $\geq 1$ DMARD                                                                             | 1, 3, 5, 10 or 15 mg BID monotherapy                                 | Adalimumab<br>SC 40 mg Q2W;<br>placebo | 24 weeks       |

| ClinicalTrials.gov identifier | Protocol number | Patients initially receiving tofacitinib, n | Patient population                                   | Tofacitinib doses                                  | Control arm  | Study duration |
|-------------------------------|-----------------|---------------------------------------------|------------------------------------------------------|----------------------------------------------------|--------------|----------------|
| NCT00603512[6]                | A3921039        | 108                                         | Active RA with inadequate response to methotrexate   | 1, 3, 5, 10 mg BID plus background methotrexate    | Placebo      | 12 weeks       |
| NCT00687193[7]                | A3921040        | 265                                         | Active RA with inadequate response to $\geq 1$ DMARD | 1, 3, 5, 10 or 15 mg BID monotherapy               | Placebo      | 12 weeks       |
| NCT01164579[8]                | A3921068        | 72                                          | Early active RA, methotrexate-naïve                  | 10 mg BID plus methotrexate, 10 mg BID monotherapy | Methotrexate | 12 months      |
| NCT00976599[9]                | A3921073        | 15                                          | Active RA with inadequate response to methotrexate   | 10 mg BID plus background methotrexate             | Placebo      | 4 weeks        |

| <b>ClinicalTrials.gov identifier</b> | <b>Protocol number</b> | <b>Patients initially receiving tofacitinib, n</b> | <b>Patient population</b>                                     | <b>Tofacitinib doses</b>                                                                 | <b>Control arm</b>                                            | <b>Study duration</b> |
|--------------------------------------|------------------------|----------------------------------------------------|---------------------------------------------------------------|------------------------------------------------------------------------------------------|---------------------------------------------------------------|-----------------------|
| NCT01059864[10]                      | A3291109               | 111                                                | Active RA                                                     | 10 mg BID, half of patients received concomitant atorvastatin<br>10 mg QD for Weeks 6-12 | None                                                          | 12 weeks              |
| NCT01359150[11]                      | A3921129               | 102                                                | Active RA                                                     | 10 mg BID monotherapy (half of patients) or with background methotrexate                 | Placebo only (half of patients), or placebo plus methotrexate | 9 weeks               |
| NCT02147587[12]                      | A3921237               | 55                                                 | Moderate to severe RA inadequately controlled by methotrexate | 5 mg BID plus background methotrexate;<br>2-3 weeks post-HZ vaccination                  | Placebo                                                       | 14 weeks              |

| ClinicalTrials.gov identifier | Protocol number     | Patients initially receiving tofacitinib, n | Patient population                                     | Tofacitinib doses                           | Control arm                                                                                   | Study duration |
|-------------------------------|---------------------|---------------------------------------------|--------------------------------------------------------|---------------------------------------------|-----------------------------------------------------------------------------------------------|----------------|
| Phase 3                       |                     |                                             |                                                        |                                             |                                                                                               |                |
| NCT00960440[13]               | ORAL Step, A3921032 | 267                                         | Moderate to severe RA with inadequate response to TNFi | 5 or 10 mg BID with background methotrexate | Placebo (advanced to tofacitinib at Month 3)                                                  | 6 months       |
| NCT00847613[14]               | ORAL Scan, A3921044 | 637                                         | Active RA with inadequate response to methotrexate     | 5 or 10 mg BID with background methotrexate | Placebo (advanced to tofacitinib at Month 3 (non-responders) or Month 6 (remaining patients)) | 24 months      |

| ClinicalTrials.gov identifier | Protocol number     | Patients initially receiving tofacitinib, n | Patient population                                   | Tofacitinib doses                      | Control arm                                                                                   | Study duration |
|-------------------------------|---------------------|---------------------------------------------|------------------------------------------------------|----------------------------------------|-----------------------------------------------------------------------------------------------|----------------|
| NCT00814307[15]               | ORAL Solo, A3921045 | 488                                         | Active RA with inadequate response to $\geq 1$ DMARD | 5 or 10 mg BID monotherapy             | Placebo (advanced to tofacitinib at Month 3)                                                  | 6 months       |
| NCT00856544[16]               | ORAL Sync, A3921046 | 636                                         | Active RA with inadequate response to $\geq 1$ DMARD | 5 or 10 mg BID with background csDMARD | Placebo (advanced to tofacitinib at Month 3 (non-responders) or Month 6 (remaining patients)) | 12 months      |

| <b>ClinicalTrials.gov identifier</b> | <b>Protocol number</b>  | <b>Patients initially receiving tofacitinib, n</b> | <b>Patient population</b>                                                 | <b>Tofacitinib doses</b>                                | <b>Control arm</b>                                                                                                                                     | <b>Study duration</b> |
|--------------------------------------|-------------------------|----------------------------------------------------|---------------------------------------------------------------------------|---------------------------------------------------------|--------------------------------------------------------------------------------------------------------------------------------------------------------|-----------------------|
| NCT00853385[17]                      | ORAL Standard, A3921064 | 405                                                | Active RA with incomplete response to methotrexate                        | 5 or 10 mg BID with background methotrexate             | Adalimumab 40 mg SC Q2W; placebo (patients receiving placebo were advanced to tofacitinib at Month 3 (non-responders) or Month 6 (remaining patients)) | 12 months             |
| NCT01039688[18]                      | ORAL Start, A3921069    | 770                                                | Active RA, methotrexate-naïve                                             | 5 or 10 mg BID monotherapy                              | Methotrexate                                                                                                                                           | 24 months             |
| NCT02281552[19]                      | A3921215                | 209                                                | Japanese patients with active RA with inadequate response to methotrexate | 11 mg MR QD or 5 mg IR BID with background methotrexate | None                                                                                                                                                   | 12 weeks              |



| ClinicalTrials.gov identifier | Protocol number         | Patients initially receiving tofacitinib, n | Patient population                                 | Tofacitinib doses                                       | Control arm                                          | Study duration |
|-------------------------------|-------------------------|---------------------------------------------|----------------------------------------------------|---------------------------------------------------------|------------------------------------------------------|----------------|
| Phase 3b/4                    |                         |                                             |                                                    |                                                         |                                                      |                |
| NCT02187055[20]               | ORAL Strategy, A3921187 | 760                                         | Active RA with inadequate response to methotrexate | 5 mg BID monotherapy or with background methotrexate    | Adalimumab 40 mg SC Q2W with background methotrexate | 12 months      |
| NCT02831855[21]               | ORAL Shift, A3921192    | 623                                         | Active RA with inadequate response to methotrexate | 11 mg MR QD monotherapy or with background methotrexate | None                                                 | 48 weeks       |
| LTE                           |                         |                                             |                                                    |                                                         |                                                      |                |
| NCT00413699[22]               | ORAL Sequel, A3921024   | 4481 (final data cut March 2017)            | Active RA who participated in the above studies    | 5 or 10 mg BID, concomitant DMARDs permitted            | None                                                 | 114 months     |

| <b>ClinicalTrials.gov identifier</b>                 | <b>Protocol number</b>                   | <b>Patients initially receiving tofacitinib, n</b>    | <b>Patient population</b>                                                                   | <b>Tofacitinib doses</b>                                   | <b>Control arm</b> | <b>Study duration</b>    |
|------------------------------------------------------|------------------------------------------|-------------------------------------------------------|---------------------------------------------------------------------------------------------|------------------------------------------------------------|--------------------|--------------------------|
| NCT00661661[23]                                      | A3921041                                 | 486                                                   | Japanese patients with active RA who participated in studies A3921039, A3921040 or A3921044 | 5 or 10 mg BID, concomitant DMARDs permitted after Week 12 | None               | 72 months                |
| Pooled LTE<br>NCT00413699;<br>NCT00661661[24,<br>25] | ORAL<br>Sequel,<br>A3921024;<br>A3921041 | 4967<br>(ORAL Sequel<br>final data cut<br>March 2017) | Active RA who participated in the above studies                                             | 5 or 10 mg BID, concomitant DMARDs permitted               | None               | 114 months;<br>72 months |

| ClinicalTrials.gov identifier | Protocol number              | Patients initially receiving tofacitinib, n | Patient population                                                     | Tofacitinib doses                                   | Control arm                            | Study duration |
|-------------------------------|------------------------------|---------------------------------------------|------------------------------------------------------------------------|-----------------------------------------------------|----------------------------------------|----------------|
| <b>PsA clinical trials</b>    |                              |                                             |                                                                        |                                                     |                                        |                |
| Phase 3                       |                              |                                             |                                                                        |                                                     |                                        |                |
| NCT01877668[26]               | OPAL<br>Broaden,<br>A3921091 | 211                                         | Active PsA, TNFi-naïve with an inadequate response to $\geq 1$ csDMARD | 5 or 10 mg BID with a stable dose of a single DMARD | Placebo,<br>adalimumab<br>40 mg SC Q2W | 12 months      |
| NCT01882439[27]               | OPAL<br>Beyond,<br>A3921125  | 263                                         | Active PsA with an inadequate response to $\geq 1$ TNFi                | 5 or 10 mg BID with a stable dose of a single DMARD | Placebo                                | 6 months       |

| ClinicalTrials.gov identifier | Protocol number        | Patients initially receiving tofacitinib, n | Patient population                                            | Tofacitinib doses                                   | Control arm | Study duration |
|-------------------------------|------------------------|---------------------------------------------|---------------------------------------------------------------|-----------------------------------------------------|-------------|----------------|
| LTE                           |                        |                                             |                                                               |                                                     |             |                |
| NCT01976364[28]               | OPAL Balance, A3921092 | 686                                         | Patients from OPAL Broaden, A3921091 and OPAL Beyond A3921125 | 5 mg BID or 10 mg BID, concomitant DMARDs permitted | None        | 36 months      |
| <b>UC clinical trials</b>     |                        |                                             |                                                               |                                                     |             |                |
| Phase 2                       |                        |                                             |                                                               |                                                     |             |                |
| NCT00787202[29]               | A3921063               | 146                                         | Moderate to severe UC                                         | 0.5, 3, 10 or 15 mg BID                             | Placebo     | 8 weeks        |

| <b>ClinicalTrials.gov<br/>identifier</b> | <b>Protocol<br/>number</b>         | <b>Patients<br/>initially<br/>receiving<br/>tofacitinib, n</b> | <b>Patient population</b>                                                                                            | <b>Tofacitinib doses</b> | <b>Control arm</b> | <b>Study duration</b> |
|------------------------------------------|------------------------------------|----------------------------------------------------------------|----------------------------------------------------------------------------------------------------------------------|--------------------------|--------------------|-----------------------|
| Phase 3                                  |                                    |                                                                |                                                                                                                      |                          |                    |                       |
| NCT01465763[30]                          | OCTAVE<br>Induction 1,<br>A3921094 | 492                                                            | Moderate to severe<br>UC with prior<br>failure/intolerance to<br>corticosteroids,<br>immunomodulators<br>and/or TNFi | 10 or 15 mg BID          | Placebo            | 8 weeks               |
| NCT01458951[30]                          | OCTAVE<br>Induction 2,<br>A3921095 | 435                                                            | Moderate to severe<br>UC with prior<br>failure/intolerance to<br>corticosteroids,<br>immunomodulators<br>and/or TNFi | 10 or 15 mg BID          | Placebo            | 8 weeks               |

| ClinicalTrials.gov identifier | Protocol number          | Patients initially receiving tofacitinib, n | Patient population                                                                                     | Tofacitinib doses | Control arm | Study duration |
|-------------------------------|--------------------------|---------------------------------------------|--------------------------------------------------------------------------------------------------------|-------------------|-------------|----------------|
| NCT01458574[30]               | OCTAVE Sustain, A3921096 | 395                                         | Moderate to severe UC, completing OCTAVE Induction 1 or 2 with clinical response                       | 5 or 10 mg BID    | Placebo     | 52 weeks       |
| LTE                           |                          |                                             |                                                                                                        |                   |             |                |
| NCT01470612[31]               | OCTAVE Open, A3921139    | 944                                         | Patients from OCTAVE Induction 1, A3921094; OCTAVE Induction 2, A3921095; and OCTAVE Sustain, A3921096 | 5 or 10 mg BID    | None        | ≥12 months     |
| <b>PsO clinical trials</b>    |                          |                                             |                                                                                                        |                   |             |                |

| ClinicalTrials.gov identifier | Protocol number       | Patients initially receiving tofacitinib, n | Patient population                                                   | Tofacitinib doses | Control arm                      | Study duration |
|-------------------------------|-----------------------|---------------------------------------------|----------------------------------------------------------------------|-------------------|----------------------------------|----------------|
| Phase 2                       |                       |                                             |                                                                      |                   |                                  |                |
| NCT00678210[32]               | A3921047              | 147                                         | Moderate to severe chronic PsO                                       | 2, 5 or 15 mg BID | Placebo                          | 12 weeks       |
| NCT01710046[33]               | A3921147              | 9                                           | Moderate to severe chronic PsO                                       | 10 mg BID         | Placebo                          | 12 weeks       |
| Phase 3                       |                       |                                             |                                                                      |                   |                                  |                |
| NCT01241591[34]               | OPT COMPARE, A3921080 | 659                                         | Moderate to severe chronic PsO who participated in the above studies | 5 or 10 mg BID    | Placebo, etanercept 50 mg SC Q2W | 12 weeks       |

| <b>ClinicalTrials.gov identifier</b> | <b>Protocol number</b>  | <b>Patients initially receiving tofacitinib, n</b> | <b>Patient population</b>      | <b>Tofacitinib doses</b> | <b>Control arm</b>         | <b>Study duration</b> |
|--------------------------------------|-------------------------|----------------------------------------------------|--------------------------------|--------------------------|----------------------------|-----------------------|
| NCT01186744[35]                      | A3921111                | 666                                                | Moderate to severe chronic PsO | 5 or 10 mg BID           | Placebo (withdrawal phase) | 56 weeks              |
| NCT01276639[36]                      | OPT PIVOTAL 1, A3921078 | 723                                                | Moderate to severe chronic PsO | 5 or 10 mg BID           | Placebo                    | 16 weeks              |
| NCT01309737[36]                      | OPT PIVOTAL 2, A3921079 | 763                                                | Moderate to severe chronic PsO | 5 or 10 mg BID           | Placebo                    | 16 weeks              |
| LTE                                  |                         |                                                    |                                |                          |                            |                       |
| NCT01163253[37]                      | A3921061                | 2881                                               | Moderate to severe chronic PsO | 5 or 10 mg BID           | None                       | Maximum of 66 months  |



BID, twice daily; csDMARD, conventional synthetic disease-modifying antirheumatic drug; DMARD, disease-modifying antirheumatic drug; HZ, herpes zoster; IR, immediate release; LTE, long-term extension; MR, modified release; n, number of patients; QD, once daily; Q2W, every 2 weeks; PsA, psoriatic arthritis; PsO, psoriasis; RA, rheumatoid arthritis; SC, subcutaneous; TNFi, tumour necrosis factor inhibitor; UC, ulcerative colitis.

### **Treatment-emergent adverse events (AEs) and AEs of special interest**

The most common treatment-emergent AEs by Medical Dictionary for Regulatory Activities System Organ Class for all cohorts were infections and infestations, which were reported in 60.0%, 62.7%, 55.4% and 58.4% of patients in the rheumatoid arthritis (RA), psoriatic arthritis (PsA), ulcerative colitis (UC) and psoriasis (PsO) cohorts, respectively. The most common events by Preferred Term were: nasopharyngitis (16.1%) and upper respiratory tract infection (URTI; 15.8%) for RA; URTI (20.1%) and nasopharyngitis (17.1%) for PsA; ulcerative colitis (24.2%), nasopharyngitis (21.7%) and URTI (11.1%) for UC; and viral URTI (21.4%) and blood creatine phosphokinase increased (14.7%) for PsO.

Time to mortality, serious infection events and herpes zoster was similar across diseases, and for both average tofacitinib 5 and 10 mg twice daily (BID) (online supplementary figures S1A-F and S2).

The five most common adjudicated malignancies (excluding non-melanoma skin cancer) for each cohort (including those reported outside the 28-day risk period) included lung (n=39), breast (n=36), melanoma (n=20), non-Hodgkin's lymphoma (n=19), colorectal (n=14) and prostate (n=13) for RA; breast (n=3), bladder (n=3), colorectal (n=3), prostate (n=3) and thyroid (n=2) for PsA; colorectal and breast (both n=3) and cervix, melanoma and soft tissue sarcoma (all n=2) for UC; and prostate (n=18), lung (n=10), breast (n=8), pancreatic (n=5) and melanoma (n=5) for PsO (table S3). The risk of patients experiencing malignancies, non-melanoma skin cancer, melanoma and lymphoma/lymphoproliferative disorders was consistent across time points (online supplementary figure S1G-N).

Adjudicated major adverse cardiovascular events (total events including those outside the 28-day risk period) included non-fatal myocardial infarction (MI; n=34), procedure-related MI (n=1), ischaemic stroke (n=21), haemorrhagic stroke (n=8), embolic

stroke (n=2), stroke unclassified (n=2), fatal MI (n=4), fatal stroke (n=4), sudden cardiac death (n=14), fatal heart failure (n=3) and other cardiac/vascular deaths (n=4) for RA; non-fatal MI (n=3), non-fatal ischaemic stroke (n=2), sudden cardiac death (n=3) and one other cardiovascular death in the PsA cohort; three non-fatal events each of MI and cerebrovascular accident, and one fatal event of aortic dissection in the UC cohort; and non-fatal MI (n=10), non-fatal ischaemic events (n=6), fatal MI (n=3), sudden cardiac death (n=10) and one other cardiovascular death for PsO.

**Table S2.** Number of adjudicated OI events by Preferred Term

| Average tofacitinib 5 mg BID           | Average tofacitinib 10 mg BID     |
|----------------------------------------|-----------------------------------|
| <b>RA</b>                              |                                   |
| N=3969                                 | N=3995                            |
| Tuberculosis (n=13)                    | HZ (n=47)                         |
| HZ (n=9)                               | Tuberculosis (n=31)               |
| Pneumocystis jirovecii pneumonia (n=6) | Oesophageal candidiasis (n=6)     |
| Pneumonia (n=5)                        | Pneumonia, cryptococcal (n=2)     |
| Oesophageal candidiasis (n=5)          | CMV viremia (n=1)                 |
| CMV hepatitis (n=1)                    | CMV chorioretinitis (n=1)         |
| CMV infection (n=1)                    | Varicella zoster (n=2)            |
| CMV chorioretinitis (n=1)              | Pneumonia, CMV (n=1)              |
| Lower RTI (n=1)                        | Septic shock (n=1)                |
| Pneumonia, cryptococcal (n=1)          | Mycobacterium avium complex (n=1) |
| Atypical mycobacterial infection (n=1) | Sialoadenitis (n=1)               |
| Sepsis (n=1)                           |                                   |
| Meningitis, cryptococcal (n=1)         |                                   |
| <b>PsA</b>                             |                                   |
| N=458                                  | N=325                             |
| HZ (n=3)                               | HZ (n=4)                          |

| <b>UC</b>                     |                                 |
|-------------------------------|---------------------------------|
| N=198                         | N=926                           |
| HZ (n=11)*                    | HZ (n=26)†                      |
| Pulmonary mycosis (n=1)       | CMV hepatitis (n=1)             |
|                               | CMV infection (n=1)             |
|                               | Histoplasmosis (n=1)            |
| <b>PsO</b>                    |                                 |
| N=920                         | N=2743                          |
| HZ (n=4)                      | HZ (n=31)                       |
| Bartonellosis (n=1)           | Herpes simplex meningitis (n=1) |
| Pneumonia, fungal (n=1)       | Varicella zoster virus (n=3)    |
| Pneumonia, cryptococcal (n=1) | Listeria encephalitis (n=1)     |
|                               | Tuberculosis (n=1)              |
|                               | Pleural effusion (n=1)          |

\*Includes three events adjudicated as HZ with two adjacent dermatomes.

†Includes nine events adjudicated as HZ with two adjacent dermatomes.

BID, twice daily; CMV, cytomegalovirus; HZ, herpes zoster; N, number of patients in the disease cohort; n, number of adjudicated events; NMSC, non-melanoma skin cancer; OI, opportunistic infection; PsA, psoriatic arthritis; PsO, psoriasis; RA, rheumatoid arthritis; RTI, respiratory tract infection; UC, ulcerative colitis.

**Table S3.** Number of adjudicated malignancy events (excluding NMSC) by Preferred Term\*

| <b>Average tofacitinib 5 mg BID</b> | <b>Average tofacitinib 10 mg BID</b> |
|-------------------------------------|--------------------------------------|
| <b>RA</b>                           |                                      |
| N=3969                              | N=3995                               |
| Lung (n=18)                         | Lung (n=21)                          |
| Breast (n=15)                       | Breast (n=21)                        |
| Colorectal (n=8)                    | Melanoma (n=17)                      |
| Non-Hodgkin's lymphoma (n=5)        | Non-Hodgkin's lymphoma (n=14)        |
| Renal (n=4)                         | Prostate (n=9)                       |
| Prostate (n=4)                      | Colorectal (n=6)                     |
| Melanoma (n=3)                      | Cervical (n=7)                       |
| Gastric (n=3)                       | Unspecified/unknown (n=7)            |
| Thyroid (n=3)                       | Thyroid (n=4)                        |
| Ovarian (n=3)                       | Bladder (n=4)                        |
| Uterus (n=3)                        | Uterine (n=4)                        |
| Vulvar (n=2)                        | Vulvar (n=3)                         |
| Cervical (n=2)                      | Renal (n=3)                          |
| Pleural (n=2)                       | Soft tissue sarcoma (n=3)            |
| Soft tissue sarcoma (n=2)           | Gastric (n=2)                        |
| Vaginal (n=1)                       | Ovarian (n=2)                        |
| Fallopian (n=1)                     | Laryngeal (n=2)                      |

|                                           |                                           |
|-------------------------------------------|-------------------------------------------|
| Bladder (n=1)                             | Oesophageal (n=2)                         |
| Salivary (n=1)                            | Glioblastoma (n=2)                        |
| Oesophageal (n=1)                         | Lip/oral cavity (n=1)                     |
| Gall bladder/extrahepatic bile duct (n=1) | Renal/pelvic/ureter (n=1)                 |
| Laryngeal (n=1)                           | Liver (n=1)                               |
| Adrenal (n=1)                             | Gall bladder/extrahepatic bile duct (n=1) |
| Choroid plexus atypical papilloma (n=1)   | Head/neck (ill-defined site; n=1)         |
| Glioblastoma (n=1)                        | Acute myeloid leukaemia (n=1)             |
| Acute myeloid leukaemia (n=1)             | Hodgkin's lymphoma (n=1)                  |
| Myeloproliferative neoplasm (n=1)         | Neuroendocrine (n=1)                      |
| Hodgkin's lymphoma (n=1)                  |                                           |
| Unknown (n=1)                             |                                           |
| <b>PsA</b>                                |                                           |
| N=458                                     | N=325                                     |
| Breast (n=3)                              | Prostate (n=2)                            |
| Bladder (n=3)                             | Colorectal (n=1)                          |
| Colorectal (n=2)                          |                                           |
| Pancreatic (n=1)                          |                                           |
| Prostate (n=1)                            |                                           |
| Thyroid (n=2)                             |                                           |
| Renal (n=1)                               |                                           |

| UC                                  |                                           |
|-------------------------------------|-------------------------------------------|
| N=198                               | N=926                                     |
| Vulvar (n=1)                        |                                           |
| Lymphoma (n=1)                      |                                           |
| Breast (n=2)                        | Colorectal (n=3)                          |
| Diffuse large B-cell lymphoma (n=1) | Cervical (n=2)                            |
|                                     | Melanoma (n=2)                            |
|                                     | Soft tissue sarcoma (n=2)                 |
|                                     | Breast (n=1)                              |
|                                     | Non-Hodgkin's lymphoma (n=1)              |
|                                     | Oesophageal (n=1)                         |
|                                     | Penile (n=1)                              |
|                                     | Gall bladder/extrahepatic bile duct (n=1) |
|                                     | Liver (n=1)                               |
|                                     | Renal (n=1)                               |
|                                     | Lung (n=1)                                |
|                                     | Myeloproliferative neoplasm (n=1)         |
|                                     | Acute myeloid leukaemia (n=1)             |
| PsO                                 |                                           |
| N=920                               | N=2743                                    |
| Breast (n=5)                        | Prostate (n=15)                           |



---

|                                  |                                           |
|----------------------------------|-------------------------------------------|
| Prostate (n=3)                   | Lung (n=7)                                |
| Lung (n=3)                       | Pancreatic (n=5)                          |
| Renal (n=2)                      | Breast (n=3)                              |
| Melanoma (n=2)                   | Colorectal (n=3)                          |
| Cancer of ampulla of vater (n=1) | Melanoma (n=3)                            |
| Colorectal (n=1)                 | Lymphoma (n=3)                            |
| Bladder (n=1)                    | Small intestinal (n=2)                    |
| Uterine (n=1)                    | Uterine (n=2)                             |
| Oesophageal (n=1)                | Soft tissue sarcoma (n=2)                 |
| Nasal/sinus (n=1)                | Renal (n=1)                               |
| Lymphoma (n=1)                   | Bladder (n=1)                             |
|                                  | Gall bladder/extrahepatic bile duct (n=1) |
|                                  | Gastric (n=1)                             |
|                                  | Pleural (n=1)                             |
|                                  | Laryngeal (n=1)                           |
|                                  | Testicular (n=1)                          |
|                                  | Vaginal (n=1)                             |
|                                  | Oligodendroglioma (n=1)                   |
|                                  | Head/neck (ill-defined site; n=1)         |
|                                  | Pharyngeal (n=1)                          |
|                                  | Unspecified (n=1)                         |

---

\*Includes all events reported for the overall risk period.

BID, twice daily; n, number of events; N, number of patients in the disease cohort; n, number of adjudicated events; NMSC, non-melanoma skin cancer; PsA, psoriatic arthritis; PsO, psoriasis; RA, rheumatoid arthritis; UC, ulcerative colitis.

**Table S4.** IRs (95% CI) for adjudicated gastrointestinal perforations according to concomitant NSAID and corticosteroid use

|                           | <b>RA</b>                      | <b>PsA</b>                   | <b>UC*,†</b>                  | <b>PsO</b>                    |
|---------------------------|--------------------------------|------------------------------|-------------------------------|-------------------------------|
| <b>NSAID use</b>          |                                |                              |                               |                               |
| Yes, IR (95% CI)          | N=5782<br>0.1 (0.1-0.2) [n=24] | N=448<br>0.1 (0.0-0.5) [n=1] | N=71<br>0.0 (0.0-2.0) [n=0]   | N=420<br>0.1 (0.0-0.5) [n=1]  |
| No, IR (95% CI)           | N=2182<br>0.1 (0.0-0.1) [n=3]  | N=335<br>0.0 (0.0-0.4) [n=0] | N=1053<br>0.1 (0.0-0.4) [n=3] | N=3243<br>0.1 (0.0-0.2) [n=6] |
| <b>Corticosteroid use</b> |                                |                              |                               |                               |
| Yes, IR (95% CI)          | N=4254<br>0.2 (0.1-0.2) [n=20] | N=171<br>0.0 (0.0-0.9) [n=0] | N=505<br>0.2 (0.0-0.7) [n=2]  | —‡                            |
| No, IR (95% CI)           | N=3710<br>0.1 (0.0-0.1) [n=7]  | N=612<br>0.1 (0.0-0.3) [n=1] | N=619<br>0.3 (0.1-0.7) [n=4]  | —‡                            |

\*Adjudicated data for the UC cohort does not include the phase 2 study.

†Adjudicated gastrointestinal perforations for the UC cohort excludes Preferred Terms of pilonidal cyst, perirectal abscess, rectal abscess, anal abscess, perineal abscess and any Preferred Terms containing the term fistula.

‡Concomitant corticosteroid use was not permitted in the PsO studies.

IR, incidence rate (unique patients with events per 100 patient-years); N, number of patients per category in the disease cohort; n, number of patients with the event (events are counted up to 28 days beyond the last dose or to the data cut-off date); NSAID, non-steroidal anti-inflammatory drug; PsA, psoriatic arthritis; PsO psoriasis;

RA, rheumatoid arthritis; UC, ulcerative colitis.

**Figure S1.** Kaplan-Meier plots of (A, B) time to mortality; (C, D) serious infection; (E, F) all HZ (non-serious and serious); (G, H) adjudicated malignancies excluding NMSC; (I, J) adjudicated NMSC; (K, L) adjudicated melanoma; and (M, N) lymphoma/lymphoproliferative disorder; for the average tofacitinib 5 mg BID and 10 mg BID doses.

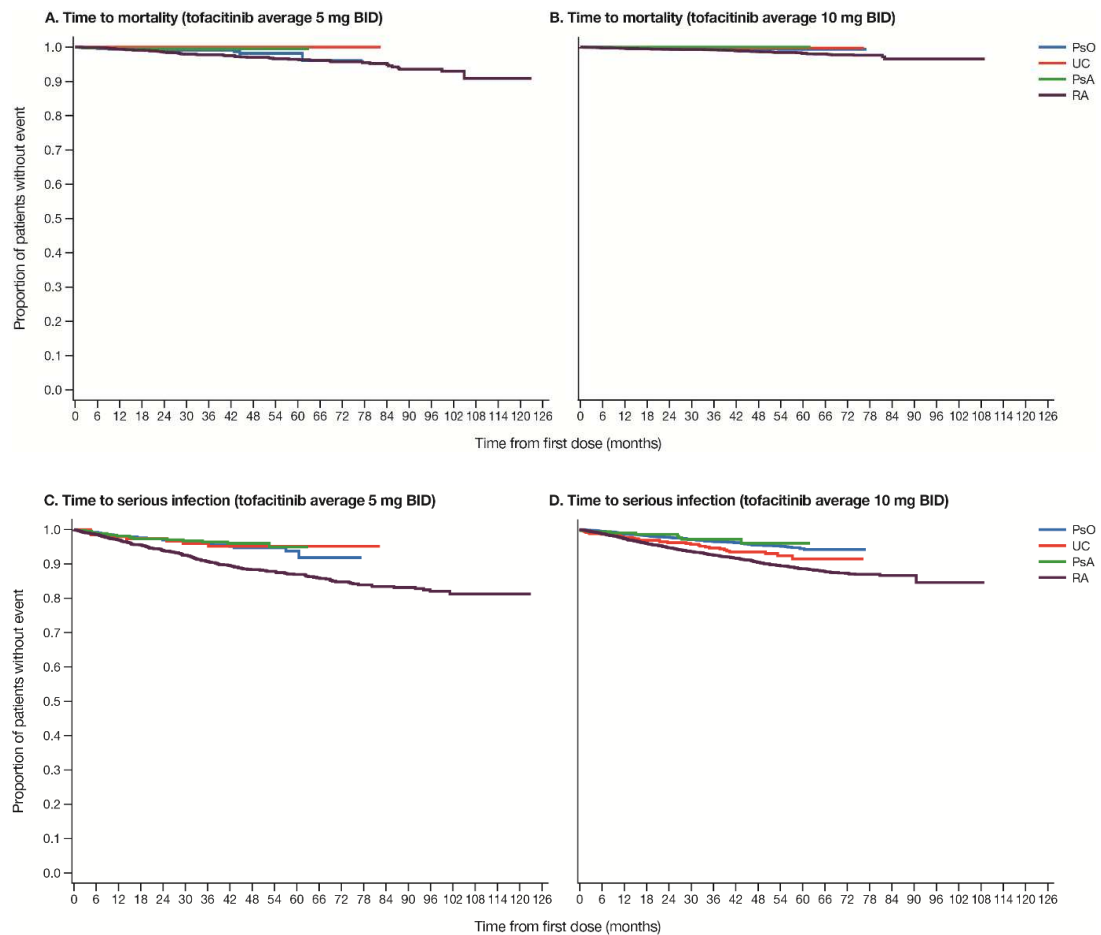

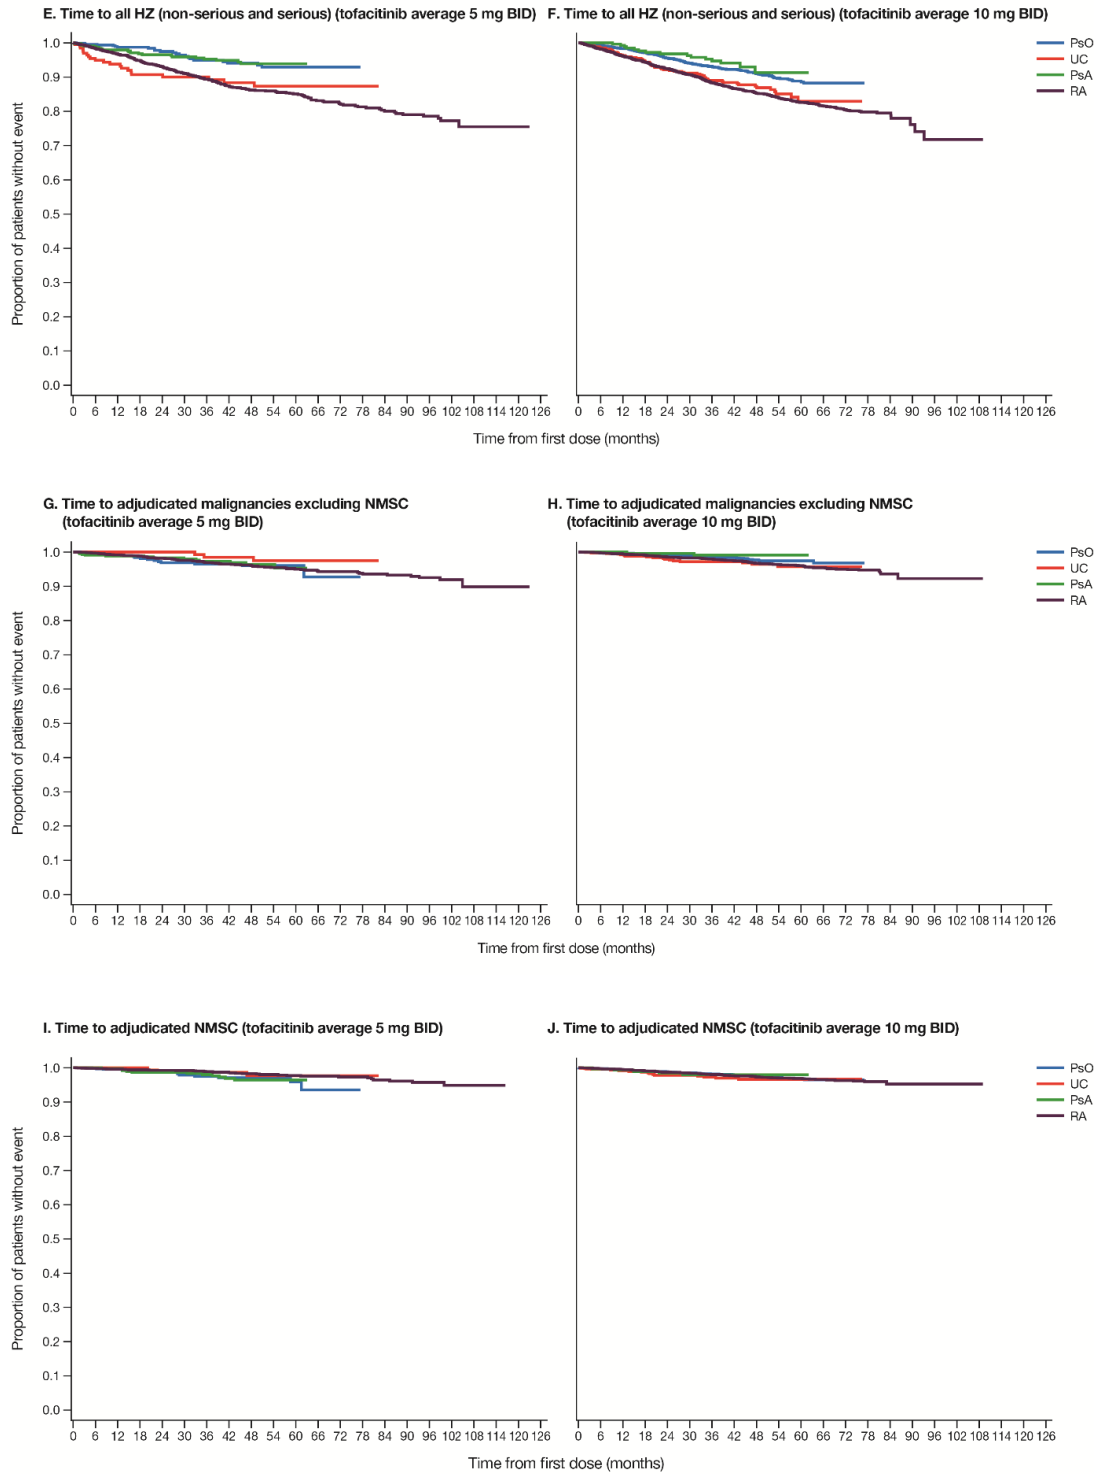

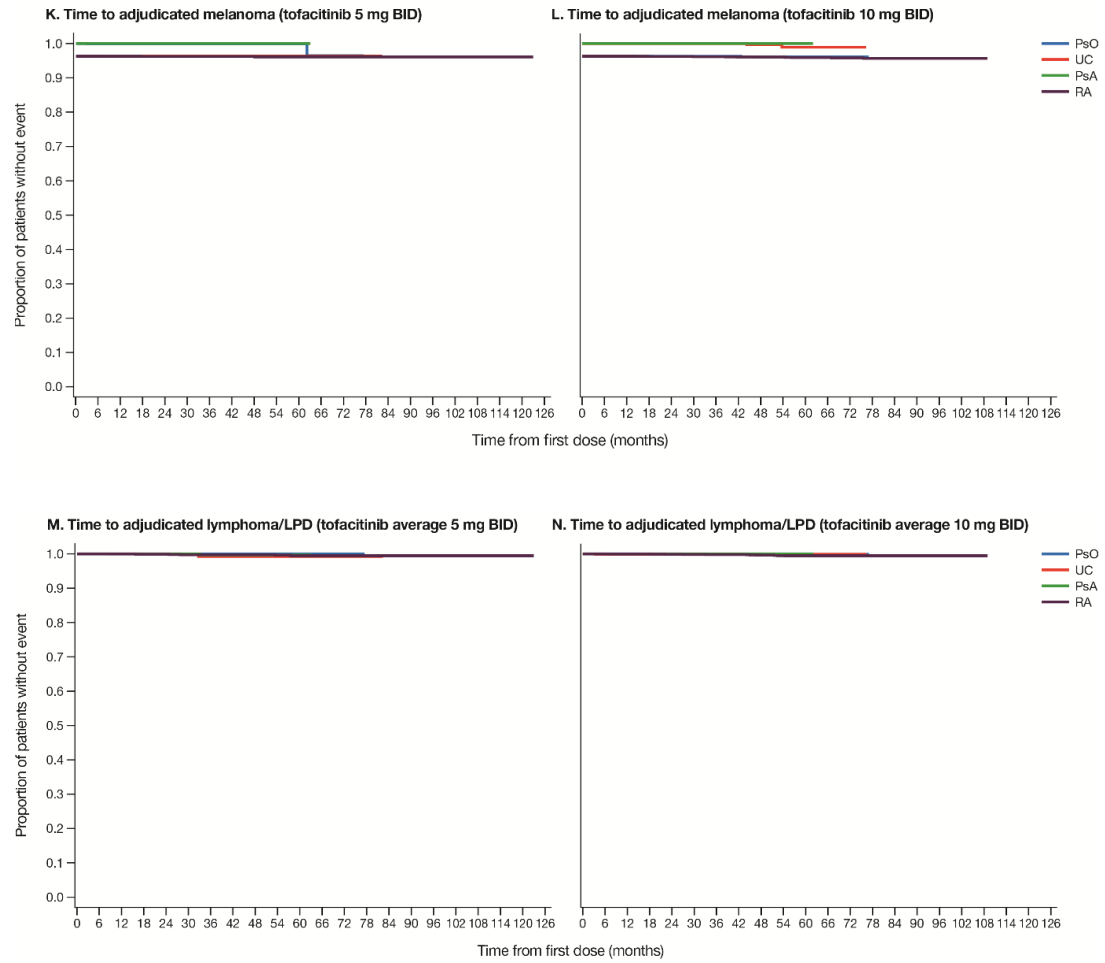

BID, twice daily; HZ, herpes zoster; NMSC, non-melanoma skin cancer; PsA, psoriatic arthritis; PsO, psoriasis; RA, rheumatoid arthritis; UC, ulcerative colitis.

**Figure S2.** Cumulative probability plots of (A, B) serious infections, and (C, D) HZ (serious and non-serious).

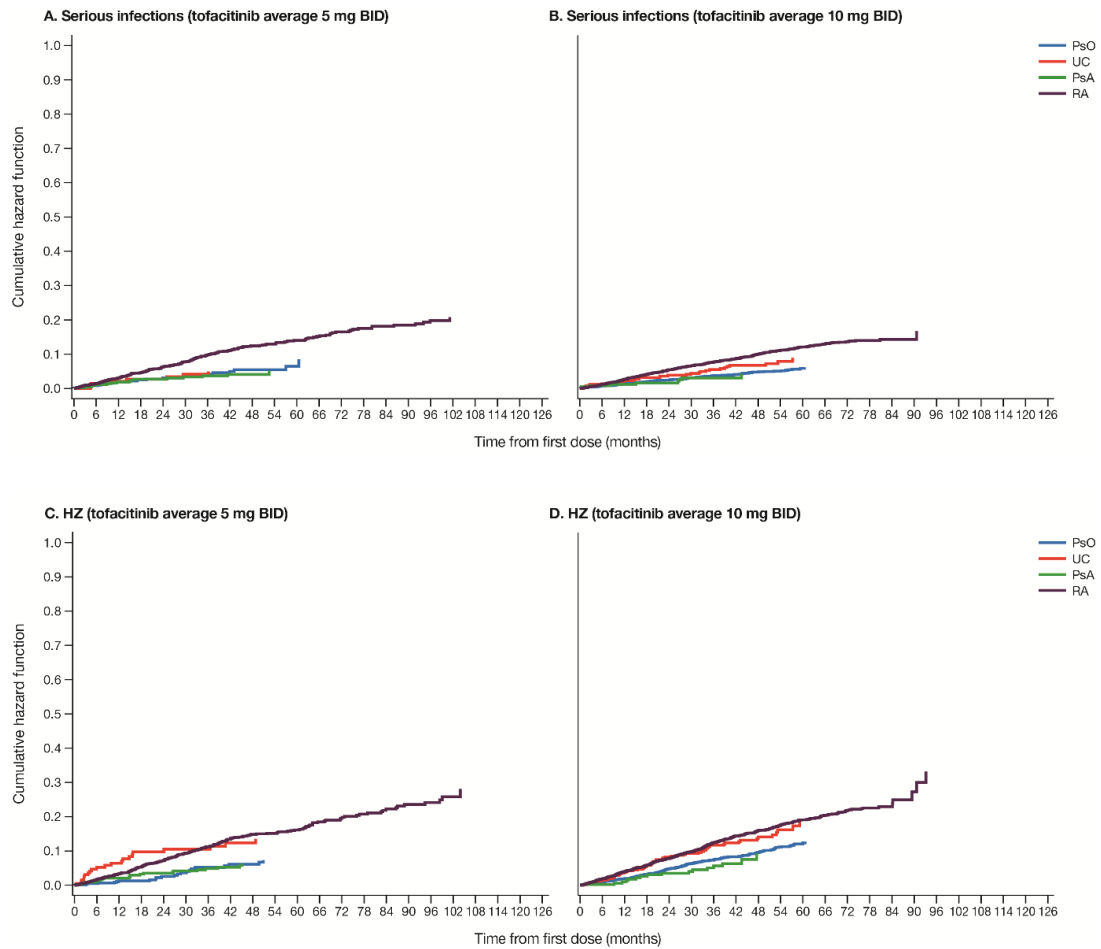

HZ, herpes zoster; PsA, psoriatic arthritis; PsO, psoriasis; RA, rheumatoid arthritis; UC, ulcerative colitis.

## References

- 1 Charles-Schoeman C, Fleischmann R, Davignon J, et al. Potential mechanisms leading to the abnormal lipid profile in patients with rheumatoid arthritis versus healthy volunteers and reversal by tofacitinib. *Arthritis Rheumatol* 2015;67:616–25.
- 2 Kremer JM, Kivitz AJ, Simon-Campos JA, et al. Evaluation of the effect of tofacitinib on measured glomerular filtration rate in patients with active rheumatoid arthritis: results from a randomised controlled trial. *Arthritis Res Ther* 2015;17:95.
- 3 Kremer JM, Bloom BJ, Breedveld FC, et al. The safety and efficacy of a JAK inhibitor in patients with active rheumatoid arthritis: results of a double-blind, placebo-controlled phase IIa trial of three dosage levels of CP-690,550 versus placebo. *Arthritis Rheum* 2009;60:1895–905.
- 4 Kremer JM, Cohen S, Wilkinson BE, et al. A phase IIb dose-ranging study of the oral JAK inhibitor tofacitinib (CP-690,550) versus placebo in combination with background methotrexate in patients with active rheumatoid arthritis and an inadequate response to methotrexate alone. *Arthritis Rheum* 2012;64:970–81.
- 5 Fleischmann R, Cutolo M, Genovese MC, et al. Phase IIb dose-ranging study of the oral JAK inhibitor tofacitinib (CP-690,550) or adalimumab monotherapy versus placebo in patients with active rheumatoid arthritis with an inadequate response to disease-modifying antirheumatic drugs. *Arthritis Rheum* 2012;64:617–29.
- 6 Tanaka Y, Suzuki M, Nakamura H, et al. Phase II study of tofacitinib (CP-690,550) combined with methotrexate in patients with rheumatoid arthritis and an inadequate response to methotrexate. *Arthritis Care Res (Hoboken)* 2011;63:1150–8.
- 7 Tanaka Y, Takeuchi T, Yamanaka H, et al. Efficacy and safety of tofacitinib as monotherapy in Japanese patients with active rheumatoid arthritis: a 12-week, randomized, phase 2 study. *Mod Rheumatol* 2015;25:514–21.



- 8 Conaghan PG, Østergaard M, Bowes MA, et al. Comparing the effects of tofacitinib, methotrexate and the combination, on bone marrow oedema, synovitis and bone erosion in methotrexate-naïve, early active rheumatoid arthritis: results of an exploratory randomised MRI study incorporating semiquantitative and quantitative techniques. *Ann Rheum Dis* 2016;75:1024–33.
- 9 Boyle DL, Soma K, Hodge J, et al. The JAK inhibitor tofacitinib suppresses synovial JAK1-STAT signalling in rheumatoid arthritis. *Ann Rheum Dis* 2015;74:1311–6.
- 10 McInnes IB, Kim HY, Lee SH, et al. Open-label tofacitinib and double-blind atorvastatin in rheumatoid arthritis patients: a randomised study [abstract]. *Ann Rheum Dis* 2014;73
- 11 Winthrop KL, Silverfield J, Racewicz A, et al. The effect of tofacitinib on pneumococcal and influenza vaccine responses in rheumatoid arthritis. *Ann Rheum Dis* 2016;75:687–95.
- 12 Winthrop KL, Wouters AG, Choy EH, et al. The safety and immunogenicity of live zoster vaccination in patients with rheumatoid arthritis before starting tofacitinib: a randomized phase II trial. *Arthritis Rheumatol* 2017;69:1969–77.
- 13 Burmester GR, Blanco R, Charles-Schoeman C, et al. Tofacitinib (CP-690,550) in combination with methotrexate in patients with active rheumatoid arthritis with an inadequate response to tumour necrosis factor inhibitors: a randomised phase 3 trial. *Lancet* 2013;381:451–60.
- 14 van der Heijde D, Tanaka Y, Fleischmann R, et al. Tofacitinib (CP-690,550) in patients with rheumatoid arthritis receiving methotrexate: twelve-month data from a twenty-four-month phase III randomized radiographic study. *Arthritis Rheum* 2013;65:559–70.
- 15 Fleischmann R, Kremer J, Cush J, et al. Placebo-controlled trial of tofacitinib monotherapy in rheumatoid arthritis. *N Engl J Med* 2012;367:495–507.

- 16 Kremer J, Li Z-G, Hall S, et al. Tofacitinib in combination with nonbiologic disease-modifying antirheumatic drugs in patients with active rheumatoid arthritis: a randomized trial. *Ann Intern Med* 2013;159:253–61.
- 17 van Vollenhoven RF, Fleischmann R, Cohen S, et al. Tofacitinib or adalimumab versus placebo in rheumatoid arthritis. *N Engl J Med* 2012;367:508–19.
- 18 Lee EB, Fleischmann R, Hall S, et al. Tofacitinib versus methotrexate in rheumatoid arthritis. *N Engl J Med* 2014;370:2377–86.
- 19 Tanaka Y, Sugiyama N, Toyozumi S, et al. Modified- versus immediate-release tofacitinib in Japanese rheumatoid arthritis patients: a randomized, phase III, non-inferiority study. *Rheumatology (Oxford)* 2019;58:70–9.
- 20 Fleischmann R, Mysler E, Hall S, et al. Efficacy and safety of tofacitinib monotherapy, tofacitinib with methotrexate, and adalimumab with methotrexate in patients with rheumatoid arthritis (ORAL Strategy): a phase 3b/4, double-blind, head-to-head, randomised controlled trial. *Lancet* 2017;390:457–68.
- 21 Cohen SB, Pope J, Haraoui B, et al. Methotrexate withdrawal in patients with rheumatoid arthritis who achieve low disease activity with tofacitinib modified-release 11 mg once daily plus methotrexate (ORAL Shift): a randomised, phase 3b/4, non-inferiority trial. *Lancet Rheumatol* 2019;1:E23–E34.
- 22 Wollenhaupt J, Lee EB, Curtis JR, et al. Safety and efficacy of tofacitinib for up to 9.5 years in the treatment of rheumatoid arthritis: final results of a global, open-label, long-term extension study. *Arthritis Res Ther* 2019;21:89.
- 23 Yamanaka H, Tanaka Y, Takeuchi T, et al. Tofacitinib, an oral Janus kinase inhibitor, as monotherapy or with background methotrexate, in Japanese patients with rheumatoid arthritis: an open-label, long-term extension study. *Arthritis Res Ther* 2016;18:34.

- 24 Wollenhaupt J, Silverfield J, Lee EB, et al. Tofacitinib, an oral Janus kinase inhibitor, in the treatment of rheumatoid arthritis: safety and efficacy in open-label, long-term extension studies over 8 years [abstract]. *Ann Rheum Dis* 2017;76(Suppl 2):THU0197.
- 25 Wollenhaupt J, Silverfield J, Lee EB, et al. Safety and efficacy of tofacitinib, an oral Janus kinase inhibitor, for the treatment of rheumatoid arthritis in open-label, longterm extension studies. *J Rheumatol* 2014;41:837–52.
- 26 Mease P, Hall S, FitzGerald O, et al. Tofacitinib or adalimumab versus placebo for psoriatic arthritis. *N Engl J Med* 2017;377:1537–50.
- 27 Gladman D, Rigby W, Azevedo VF, et al. Tofacitinib for psoriatic arthritis in patients with an inadequate response to TNF inhibitors. *N Engl J Med* 2017;377:1525–36.
- 28 Nash P, Coates LC, Kivitz AJ, et al. Safety and efficacy of tofacitinib in patients with active psoriatic arthritis: interim analysis of OPAL Balance, an open-label, long-term extension study. *Rheumatol Ther* 2020;7:553–80.
- 29 Sandborn WJ, Ghosh S, Panés J, et al. Tofacitinib, an oral Janus kinase inhibitor, in active ulcerative colitis. *N Engl J Med* 2012;367:616–24.
- 30 Sandborn WJ, Su C, Sands BE, et al. Tofacitinib as induction and maintenance therapy for ulcerative colitis. *N Engl J Med* 2017;376:1723–36.
- 31 Lichtenstein GR, Loftus Jr EV, Wei SC, et al. DOP61 tofacitinib, an oral, small-molecule Janus kinase inhibitor, in the treatment of ulcerative colitis: analysis of an open-label, long-term extension study with up to 5.9 years of treatment [abstract]. *J Crohns Colitis* 2020;14(Suppl 1):DOP61.
- 32 Papp KA, Menter A, Strober B, et al. Efficacy and safety of tofacitinib, an oral Janus kinase inhibitor, in the treatment of psoriasis: a Phase 2b randomized placebo-controlled dose-ranging study. *Br J Dermatol* 2012;167:668–77.

- 33 Krueger J, Clark JD, Suárez-Fariñas M, et al. Tofacitinib attenuates pathologic immune pathways in patients with psoriasis: a randomized phase 2 study. *J Allergy Clin Immunol* 2016;137:1079–90.
- 34 Bachelez H, van de Kerkhof PC, Strohal R, et al. Tofacitinib versus etanercept or placebo in moderate-to-severe chronic plaque psoriasis: a phase 3 randomised non-inferiority trial. *Lancet* 2015;386:552–61.
- 35 Bissonnette R, Iversen L, Sofen H, et al. Tofacitinib withdrawal and retreatment in moderate-to-severe chronic plaque psoriasis: a randomized controlled trial. *Br J Dermatol* 2015;172:1395–406.
- 36 Papp KA, Menter MA, Abe M, et al. Tofacitinib, an oral Janus kinase inhibitor, for the treatment of chronic plaque psoriasis: results from two, randomized, placebo-controlled, phase III trials. *Br J Dermatol* 2015;173:949–61.
- 37 Valenzuela F, Korman NJ, Bissonnette R, et al. Tofacitinib in patients with moderate to severe chronic plaque psoriasis: long-term safety and efficacy in an open-label extension study. *Br J Dermatol* 2018;179:853–62.
